# Supplementary material
Source: PubMed Central journal article supplement (PMC4203706)
Supplement: NIHMS612987-supplement-01.pdf [file NIHMS612987-supplement-01.pdf]

Supplementary Table 1. List of 27 rare, functional and homozygous variants from Patient 1. Damaging SIFT and Polyphen-2 values are displayed in bold.

| Gene            | Amino acid change | Genomic coordinate (hg19) | Nucleotide change | Read number (non-reference read / total coverage depth) | SIFT        | Polyphen-2   |
|-----------------|-------------------|---------------------------|-------------------|---------------------------------------------------------|-------------|--------------|
| <i>PRCC</i>     | p.H202L           | chr1:156756488            | A>T               | 37/37                                                   | 0.69        | 0.842        |
| <i>ATP1A4</i>   | p.M865I           | chr1:160147313            | G>A               | 45/45                                                   | <b>0.00</b> | 0.862        |
| <i>MPV17</i>    | p.R50W            | chr2:27535899             | G>A               | 37/37                                                   | <b>0.00</b> | <b>1.000</b> |
| <i>CYP1B1</i>   | p.R368H           | chr2:38298394             | C>T               | 33/33                                                   | <b>0.00</b> | <b>1.000</b> |
| <i>DGKD</i>     | p.E652K           | chr2:234358693            | G>A               | 51/51                                                   | 0.50        | 0.187        |
| <i>BBX</i>      | p.S4G             | chr3:107429317            | A>G               | 27/27                                                   | 0.17        | 0.014        |
| <i>VIPR2</i>    | p.G317S           | chr7:158826926            | C>T               | 38/38                                                   | 0.08        | <b>1.000</b> |
| <i>RAD54B</i>   | p.R415H           | chr8:95411776             | C>T               | 12/12                                                   | 0.13        | <b>1.000</b> |
| <i>EIF3A</i>    | p.R803K           | chr10:120810098           | C>T               | 192/192                                                 | 0.49        | <b>0.956</b> |
| <i>PRDX3</i>    | p.M138L           | chr10:120931979           | T>G               | 117/117                                                 | 0.26        | 0.367        |
| <i>SLC22A18</i> | p.R377Q           | chr11:2946282             | G>A               | 89/90                                                   | 0.08        | <b>1.000</b> |
| <i>OR52K2</i>   | p.I31L            | chr11:4470660             | A>C               | 138/138                                                 | 0.45        | <b>0.985</b> |
| <i>OR52K2</i>   | p.F285L           | chr11:4471424             | C>G               | 83/83                                                   | 0.30        | 0.048        |
| <i>MMP26</i>    | p.D89G            | chr11:5011044             | A>G               | 112/112                                                 | 0.45        | 0.002        |
| <i>OR10A4</i>   | p.L286F           | chr11:6898736             | G>C               | 73/73                                                   | 0.42        | <b>1.000</b> |
| <i>NLRP10</i>   | p.F533C           | chr11:7981561             | A>C               | 29/29                                                   | <b>0.00</b> | <b>0.998</b> |
| <i>TTC17</i>    | p.K202E           | chr11:43413443            | A>G               | 13/13                                                   | 0.54        | 0.491        |
| <i>GAS6</i>     | p.M172K           | chr13:114530112           | C>T               | 164/165                                                 | <b>0.00</b> | 0.863        |
| <i>GRB7</i>     | p.R255Q           | chr17:37900423            | G>A               | 66/66                                                   | 0.06        | <b>1.000</b> |
| <i>KRT34</i>    | p.T9I             | chr17:39538599            | G>A               | 80/80                                                   | <b>0.01</b> | 0.067        |
| <i>FBN3</i>     | p.R861Q           | chr19:8191204             | C>T               | 48/48                                                   | 0.29        | 0.118        |
| <i>CD97</i>     | p.N33D            | chr19:14499537            | A>G               | 94/94                                                   | 0.20        | 0.122        |

|                 |         |                |     |         |             |              |
|-----------------|---------|----------------|-----|---------|-------------|--------------|
| <i>COLGALT1</i> | p.V582I | chr19:17692128 | G>A | 165/165 | 0.30        | 0.373        |
| <i>ZNF14</i>    | p.D54G  | chr19:19824930 | T>C | 22/22   | 0.23        | <b>0.973</b> |
| <i>IFNL1</i>    | p.R175C | chr19:39789076 | C>T | 64/64   | <b>0.00</b> | <b>1.000</b> |
| <i>SPTBN4</i>   | p.E312K | chr19:41008071 | G>A | 48/48   | 0.30        | 0.870        |
| <i>CYP2A7</i>   | p.A166T | chr19:41386147 | C>T | 93/93   | 0.12        | 0.102        |
