# Supplementary material
Source: PubMed Central journal article supplement (PMC4203706)
Supplement: NIHMS612987-supplement-02.pdf [file NIHMS612987-supplement-02.pdf]

Supplementary Table 2. List of 23 rare, functional and homozygous variants from Patient 2. Damaging SIFT and Polyphen-2 values are displayed in bold. na = not applicable.

| Gene      | Amino acid change          | Genomic coordinate (hg19) | Nucleotide change | Read number (non-reference read / total coverage depth) | SIFT        | Polyphen-2   |
|-----------|----------------------------|---------------------------|-------------------|---------------------------------------------------------|-------------|--------------|
| OR5H1     | p.P79S                     | chr3:99334466             | C>T               | 277/277                                                 | <b>0.00</b> | 0.662        |
| SERAC1    | 1 bp downstream of exon 12 | chr6:158458746            | C>G               | 445/445                                                 | na          | na           |
| COL28A1   | p.V155M                    | chr7:7537722              | C>T               | 355/355                                                 | <b>0.01</b> | <b>1.000</b> |
| FAM75A1   | p.A134P                    | chr9:39877413             | G>C               | 117/117                                                 | 0.2         | <b>0.993</b> |
| DGKK      | p.K286N                    | chrX:50180225             | T>G               | 709/709                                                 | <b>0.00</b> | <b>0.999</b> |
| SHROOM4   | p.A93T                     | chrX:50398041             | C>T               | 92/92                                                   | 0.39        | 0.002        |
| SAGE1     | p.N643S                    | chrX:134820303            | A>G               | 358/358                                                 | 0.12        | 0.712        |
| VGLL1     | p.T21M                     | chrX:135445907            | C>T               | 136/136                                                 | 0.28        | <b>1.000</b> |
| ANKRD13B  | p.Q599R                    | chr17:24964641            | A>G               | 51/51                                                   | 1           | 0.000        |
| LOC401052 | p.P21L                     | chr3:10025103             | G>A               | 279/279                                                 | 0.1         | 0.938        |
| TNRC18    | p.A2084T                   | chr7:5331303              | C>T               | 159/159                                                 | 0.92        | 0.002        |
| MUC12     | p.S428Y                    | chr7:100421847            | C>A               | 238/238                                                 | <b>0.04</b> | 0.845        |
| MUC12     | p.P1271L                   | chr7:100424376            | C>T               | 138/138                                                 | 0.33        | 0.02         |
| GIT1      | p.T66M                     | chr17:24934171            | G>A               | 233/233                                                 | <b>0.01</b> | <b>1.000</b> |
| FGD1      | p.R910Q                    | chrX:54489424             | C>T               | 169/169                                                 | 1           | 0.003        |
| TESK2     | p.R18H                     | chr1:45695992             | C>T               | 501/501                                                 | <b>0.01</b> | 0.317        |
| DNAH9     | p.A1791V                   | chr17:11548465            | C>T               | 451/451                                                 | 0.1         | 0.279        |
| KCND1     | p.S575A                    | chrX:48705007             | A>C               | 181/181                                                 | 0.31        | 0.004        |
| UBXN8     | p.X209W                    | chr8:30740388             | A>G               | 944/944                                                 | na          | na           |
| FBLN2     | p.R866X                    | chr3:13645431             | C>T               | 289/289                                                 | na          | na           |
| NRK       | p.P789S                    | chrX:105046393            | C>T               | 462/462                                                 | 0.58        | 0.000        |

|       |         |                |     |         |      |       |
|-------|---------|----------------|-----|---------|------|-------|
| CDHR3 | p.A798S | chr7:105460113 | G>T | 200/200 | 0.17 | 0.017 |
| FLG   | p.T938R | chr1:150551173 | G>C | 622/622 | 0.27 | 0.000 |
