# Supplementary material
Source: PubMed Central journal article supplement (PMC4203706)
Supplement: NIHMS612987-supplement-03.pdf [file NIHMS612987-supplement-03.pdf]

Supplementary Table 3. List of 41 rare and functional variants from Patient 3. Damaging SIFT and Polyphen-2 values are displayed in bold. na = not applicable.

| Gene    | Amino acid change          | Genomic coordinate (hg19) | Nucleotide change | Read number (non-reference read / total coverage depth) | SIFT        | Polyphen-2   |
|---------|----------------------------|---------------------------|-------------------|---------------------------------------------------------|-------------|--------------|
| ABCA4   | L1970F                     | chr1:94473287             | G>A               | 58/107                                                  | <b>0.05</b> | <b>1.000</b> |
| ACTN3   | 1 bp downstream of exon 13 | chr11:66327548            | G>T               | 21/40                                                   | na          | na           |
| ARID1A  | G889D                      | chr1:27089710             | G>A               | 19/64                                                   | 0.33        | <b>0.998</b> |
| ASPM    | R2039G                     | chr1:197072266            | T>C               | 18/42                                                   | 0.36        | 0.931        |
| ATR     | R2533X                     | chr3:142176504            | G>A               | 90/168                                                  | na          | na           |
| CACNB2  | 1 bp upstream of exon 2    | chr10:18439811            | G>T               | 18/86                                                   | na          | na           |
| CEP63   | I477T                      | chr3:134280319            | T>C               | 100/206                                                 | 0.51        | 0.972        |
| CFTR    | S1426Y                     | chr7:117306996            | C>A               | 18/38                                                   | <b>0.00</b> | <b>0.997</b> |
| COG4    | E639Q                      | chr16:70516637            | C>G               | 94/182                                                  | 0.18        | 0.892        |
| CTC1    | I1155V                     | chr17:8131872             | T>C               | 63/131                                                  | 0.65        | 0.004        |
| DDB1    | S97N                       | chr11:61097467            | C>T               | 62/136                                                  | 0.52        | 0.000        |
| EYS     | V2040D                     | chr6:65016935             | A>T               | 131/275                                                 | 0.62        | <b>1.000</b> |
| FLG     | G1015S                     | chr1:152284319            | C>T               | 22/108                                                  | 0.78        | 0.000        |
| GP6     | R528C                      | chr19:55525731            | G>A               | 48/96                                                   | <b>0.00</b> | 0.003        |
| GPR179  | E861D                      | chr17:36486869            | C>A               | 27/40                                                   | <b>0.03</b> | <b>0.996</b> |
| GPR98   | Q235H                      | chr5:89923060             | A>T               | 32/56                                                   | 0.16        | 0.001        |
| HLA-C   | L315P                      | chr6:31237814             | A>G               | 7/35                                                    | <b>0.00</b> | 0.956        |
| HPS3    | L339S                      | chr3:148863186            | T>C               | 79/190                                                  | <b>0.01</b> | <b>0.973</b> |
| KIR3DL1 | V440I                      | chr19:55341713            | G>A               | 40/184                                                  | <b>0.00</b> | <b>0.996</b> |

|          |                               |                 |     |         |             |              |
|----------|-------------------------------|-----------------|-----|---------|-------------|--------------|
| KIR3DL1  | F30L                          | chr19:55329789  | C>G | 60/188  | <b>0.02</b> | 0.016        |
| KIR3DL1  | N335I                         | chr19:55340819  | A>T | 115/519 | <b>0.02</b> | 0.003        |
| MALT1    | 2 bp<br>upstream of<br>exon 3 | chr18:56363596  | A>T | 13/35   | na          | na           |
| MLL      | R503W                         | chr11:118343381 | C>T | 24/43   | <b>0.01</b> | <b>0.985</b> |
| MMP20    | Y180X                         | chr11:102480745 | A>T | 32/76   | na          | na           |
| MUC5B    | D682G                         | chr11:1253980   | A>G | 13/43   | 0.00        | 0.000        |
| NOTCH2   | H1882Y                        | chr1:120462072  | G>A | 20/39   | <b>0.00</b> | <b>1.000</b> |
| NOTCH2   | S1741L                        | chr1:120464424  | G>A | 90/159  | 0.12        | <b>0.981</b> |
| NOTCH3   | E813K                         | chr19:15295235  | C>T | 29/58   | <b>0.00</b> | <b>1.000</b> |
| NTRK1    | R55S                          | chr1:156834186  | C>A | 95/179  | 0.67        | 0.000        |
| OPN1LW   | L153M                         | chrX:153418460  | C>A | 29/29   | 0.32        | 0.066        |
| OPN1MW   | Y116S                         | chrX:153490611  | A>C | 14/50   | 0.29        | 0.002        |
| PHF8     | R809C                         | chrX:54011473   | G>A | 26/50   | <b>0.02</b> | 0.929        |
| PRICKLE2 | S525G                         | chr3:64132593   | T>C | 25/64   | 0.17        | 0.000        |
| PRSS1    | N29I                          | chr7:142458451  | A>T | 78/284  | <b>0.04</b> | 0.000        |
| PRSS1    | K170E                         | chr7:142460335  | A>G | 107/236 | 0.57        | 0.000        |
| PRSS1    | S181N                         | chr7:142460369  | G>A | 70/225  | 0.77        | 0.000        |
| PRX      | R1391W                        | chr19:40900088  | G>A | 26/59   | <b>0.01</b> | 0.000        |
| RAD50    | A985V                         | chr5:131945006  | C>T | 19/42   | 0.29        | 0.000        |
| STIL     | V56L                          | chr1:47768005   | C>A | 69/167  | 0.79        | 0.002        |
| TAZ      | F128S                         | chrX:153642450  | T>C | 35/72   | 0.73        | 0.001        |
| TLL1     | G740V                         | chr4:166996060  | G>T | 61/109  | 0.10        | <b>1.000</b> |
