# Supplementary material
Source: PubMed Central journal article supplement (PMC4203706)

Supplementary Figure 3. Variant filtering strategy for patient 3. #Public and in-house databases (please refer to Patient and Methods section of the manuscript for details). OMIM: Online Mendelian Inheritance in Man.

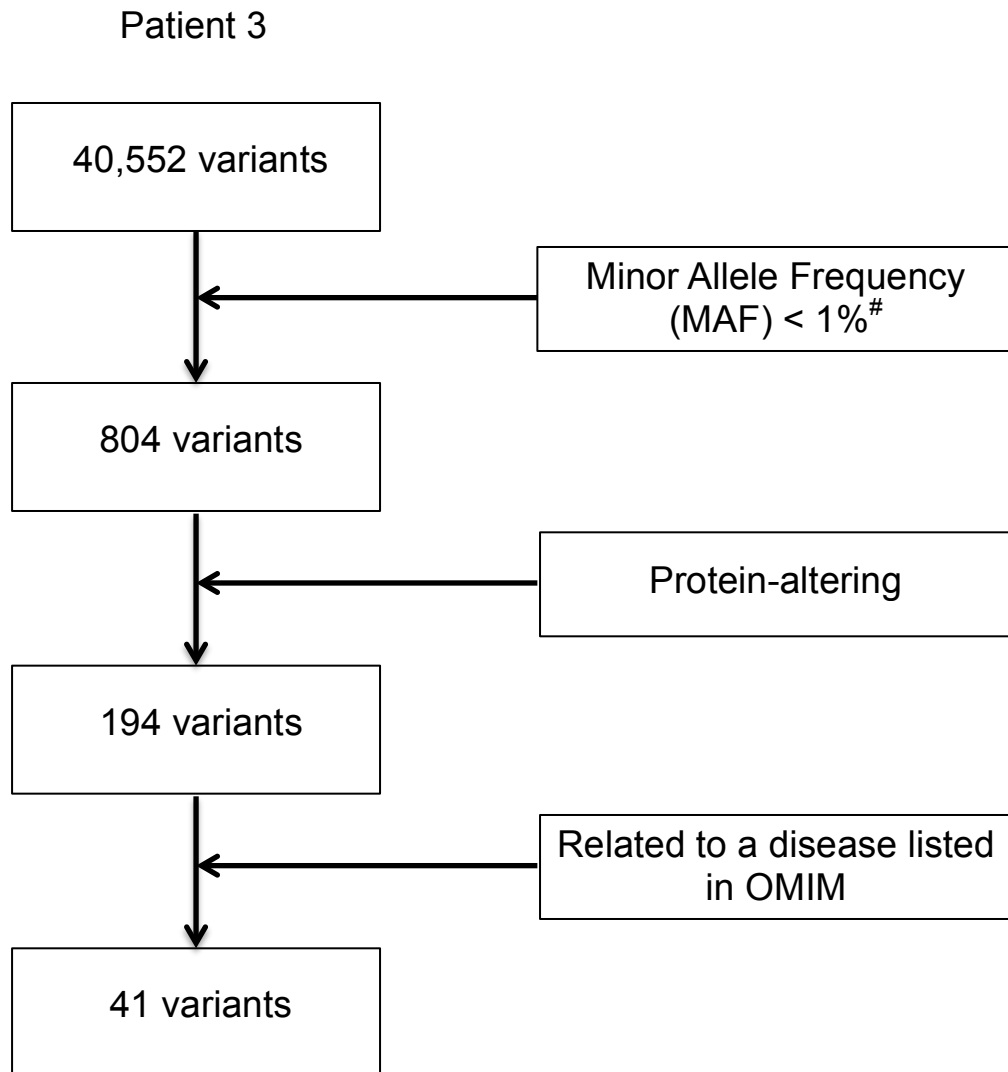

Supplement: NIHMS612987-supplement-04.pdf [file NIHMS612987-supplement-04.pdf]
