# Supplementary material
Source: PubMed Central journal article supplement (PMC4203706)

Supplementary Figure 2. Variant filtering strategy for patient 2. #Public and in-house databases (please refer to Patient and Methods section of the manuscript for details)

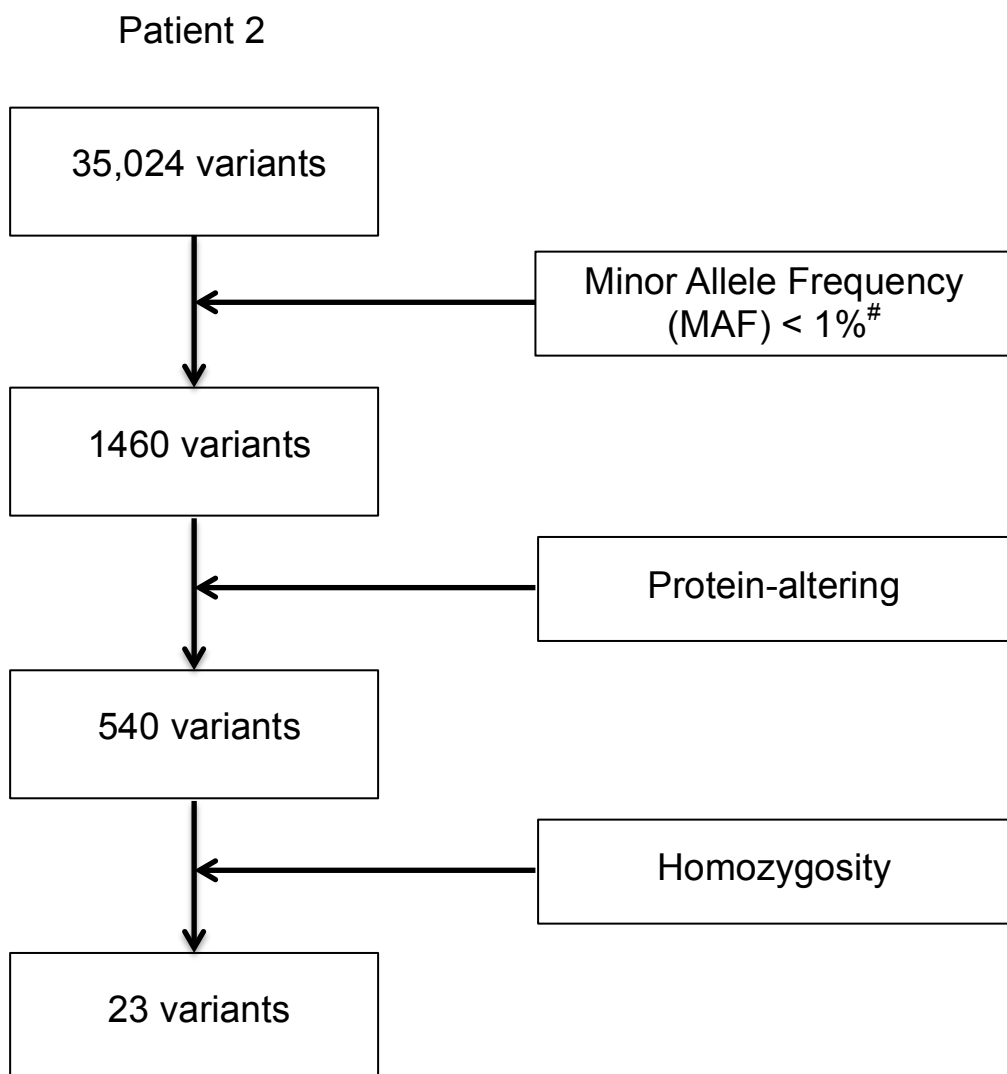

Supplement: NIHMS612987-supplement-05.pdf [file NIHMS612987-supplement-05.pdf]
